# Supplementary material
Source: Frontiers journal article supplement (https://www.frontiersin.org/articles/227259)
Supplement: Image_8.PDF [file Image_8.PDF]

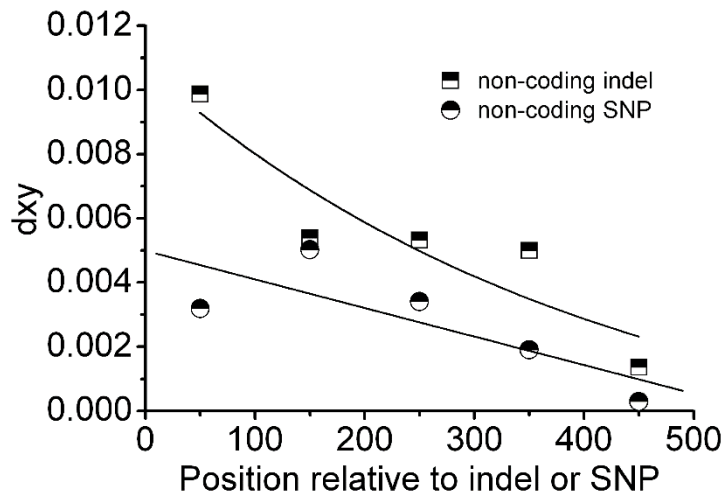

**Supplementary Figure S8.** Dxy distribution around non-coding indel/SNP from Nordborg data. Relationship between distance from the first indel or first SNP at a non-coding locus and the corresponding  $d_{xy}$  in the Nordborg data (the same as C but only 44 loci containing non-coding sequences). Each data point indicates the mean value of fixed nucleotide substitutions or  $d_{xy}$  in a given 100bp window.
